# Supplementary material
Source: Springer Nature journal article supplement (https://www.springermedizin.de/resource/supplementary/12885_2013_4648_MOESM1_ESM.pdf/9466972)
Supplement: MOESM1 [file 9466972]

**Randomised, open-label, Phase III trial**  
**Recurrent/metastatic HNSCC**  
**Second-line treatment: Patients have progressed on prior platinum-based CT**

**N=474 patients**

**Randomisation 2:1**

**Afatinib**  
**40 mg once daily\***

**MTX**  
**40 mg/m<sup>2</sup> weekly<sup>†</sup>**

**Continuous treatment until progressive disease (or adverse events requiring withdrawal)**

**Patients can continue treatment after progressive disease if deemed clinically beneficial**

**Primary endpoint: PFS**
